# Supplementary material for: Exploring the Contextual Sensitivity of Factors that Determine Cell-to-Cell Variability in Receptor-Mediated Apoptosis
Source: PLOS journal article supplement (doi:10.1371/journal.pcbi.1002482), 2012-04-26
Supplement: S2 (10.1371/journal.pcbi.1002482.s002) [file journal.pcbi.1002482.s002]

## TEXT S2 – DERIVATION OF EQUATIONS

### The Relationship Between Featured-Based and Conventional Sensitivities

A system of ordinary differential equations (ODE) involving one dynamical variable and its conventional sensitivity are defined in the following way:

$$\dot{y} = y(t; k)$$
$$\dot{S}_{y,k} = \frac{\partial y(t; k)}{\partial k}$$

where  $y$  is a dynamical variable, the dot notation of  $\dot{y}$  signifies a time derivative, and  $\dot{S}_{y,k}$  is the sensitivity of  $y$  with respect to the parameter  $k$ . Solving these equations yields the trajectories over time of the dynamical variable and of its sensitivity, respectively.

Here we consider two time-based features  $t_{delay}$  and  $t_{switch}$ , as well as their respective sensitivities. In the context of extrinsic cell death for example, we can let  $y$  represent cPARP, then the definition of  $t_{delay}$  is given by the time at which cPARP has reached a predefined threshold  $y_{threshold}$ .

$$y(t_{delay}) \equiv y_{threshold} \text{ (Eq. S1)}$$

Note that  $t_{delay}$  is defined implicitly. The switching time  $t_{switch}$  is given by the inverse of the slope of the trajectory at  $t_{delay}$ .

$$t_{switch} \equiv \left( \frac{\partial y}{\partial t} \Big|_{t_{delay}} \right)^{-1} \text{ (Eq. S2)}$$

If the dynamical variable  $y$  represents number of cPARP (as we use in EARM), then the units of the right hand side are of time. The sensitivities of these two time-based features are given by the following two expressions:

$$\dot{S}_{t_{delay};k} \equiv \frac{\partial t_{delay}}{\partial k}$$
$$\dot{S}_{t_{switch};k} \equiv \frac{\partial t_{switch}}{\partial k}$$

In order to obtain the sensitivity of  $t_{delay}$ , we take the full derivative of Equation S1 with respect to the parameter  $k$  and evaluate the expression at  $t = t_{delay}$ , noting that  $t_{delay}$  has an implicit dependence on  $k$  and that the left hand side is constant (from the definition of  $t_{delay}$  in Eq. S1) so must evaluate to 0.

$$\frac{dy}{dk} \Big|_{t=t_{delay}} = \frac{\partial y}{\partial k} \Big|_{t=t_{delay}} + \frac{\partial y}{\partial t} \Big|_{t=t_{delay}} * \frac{\partial t_{delay}}{\partial k}$$
$$= 0$$

Nevertheless, this expression can be rearranged to yield the sensitivity of  $t_{delay}$ :

$$\frac{\partial t_{delay}}{\partial k} = -\frac{\partial y}{\partial k}\bigg|_{t=t_{delay}} \left( \frac{\partial y}{\partial t}\bigg|_{t=t_{delay}} \right)^{-1} \quad \text{Eq. S3}$$

Equation S3 has an appealing geometric interpretation. The three fractions of Equation S3 are related to the three legs of a triangle in the  $y$  vs.  $t$  plot (Figure) in the following way: the slope of the hypotenuse is given by the slope of the trajectory at  $t = t_{delay}$ , which is simply the time derivative of the dynamical variable evaluated at  $t = t_{delay}$ . But the slope itself is the ratio of the length of the vertical leg to the length of the horizontal leg, which are given respectively by the conventional sensitivity of  $y$  with respect to  $k$  and the feature-based sensitivity.

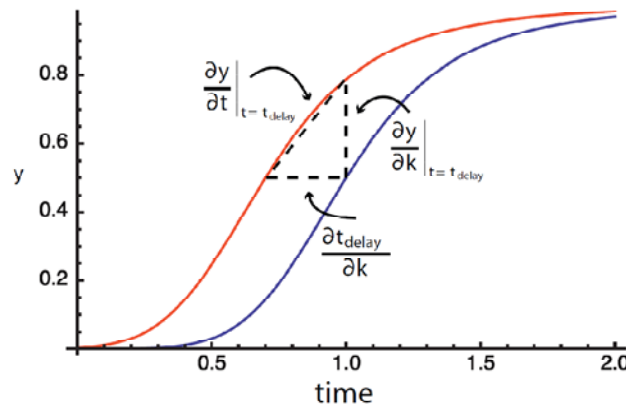

**Figure. Geometrical interpretation of the sensitivity of  $t_{delay}$ .**

To obtain the sensitivity of  $t_{switch}$ , we simply take the partial derivative with respect to  $k$  as there is no implicit dependence on  $t_{switch}$ .

$$\frac{\partial t_{switch}}{\partial k} = -\left( \frac{\partial y}{\partial t}\bigg|_{t=t_{delay}} \right)^{-2} \frac{\partial S_{y;k}}{\partial t}\bigg|_{t=t_{delay}}$$

## Sensitivities Propagate Variance in Initial Protein Concentrations to Variance in Pathway Output

A population of heterogeneous cells with varying protein content can be modeled as a collection of systems of ODEs, each instantiation with unique initial protein concentrations representing an individual cell. The following system of ODEs represents a single cell.

$$\dot{y}_i = g(t, \{y_j\}, \{k_l\}, \{y_{0,i}\})$$

$$y_i(0) = c_{0,i}$$

The dynamical variables  $y_i$  represent the levels of proteins, protein complexes and species with post-translational modifications. Initial protein concentrations vary from cell to cell but have been measured and are well-described by a multivariate log normal distribution.

$$p(\{y_{0,i}\}) \prod_{i=1}^N d(\log c_{0,i}) = \sqrt{\frac{1}{\text{Det} \sigma_{k,l}^0}} \exp \left[ -\frac{1}{2} (\log c_{0,k} - \langle \log c_{0,k} \rangle) (\sigma_{k,l}^0)^{-1} (\log c_{0,l} - \langle \log c_{0,l} \rangle) \right] \prod_{i=1}^N d(\log c_{0,i}) \quad \text{Eq. S4}$$

The measured mean log levels of the  $i^{\text{th}}$  protein is given by  $\langle \log c_{0,i} \rangle$ , and the variable  $\sigma_{k,l}^0$  denotes the measured covariances of the log concentrations. The population behavior for variable  $y_i$  is easy to write down formally.

$$p(\{y_i(t)\}) \equiv \langle \delta(y_i(t) - \hat{y}_i(t; \{c_{0,i}\})) \rangle = \int_0^\infty \prod_{i=1}^N d(\log y_{0,i}) p(\{c_{0,i}\}) \delta(y_i(t) - \hat{y}_i(t; \{c_{0,i}\})) \quad \text{Eq. S5}$$

But because the ODEs are nonlinear, a closed form for Equation S5 is generally impossible and one must settle for moment expansions.

Taylor expanding  $y_i$  and performing an average with Equation S4 yields the following:

$$\langle y_i(t) \rangle \approx y_i(t; \{\langle \log c_{0,j} \rangle\}) + \frac{\partial y_i}{\partial (\log c_{0,j})} \langle \log c_{0,j} \rangle + \frac{1}{2} \frac{\partial^2 y_i}{\partial \log c_{0,j} \partial \log c_{0,k}} \langle \log c_{0,j} \log c_{0,k} \rangle$$

The second moment is given by

$$\langle y_i(t) y_j(t) \rangle - \langle y_i(t) \rangle \langle y_j(t) \rangle$$

Evaluating its Taylor expansion to second order yields the expression

$$\frac{\partial y_i}{\partial (\log c_{0,k})} \frac{\partial y_j}{\partial (\log c_{0,l})} \langle \log c_{0,k} \log c_{0,l} \rangle - \langle \log c_{0,k} \log c_{0,l} \rangle = \frac{\partial y_i}{\partial (\log c_{0,k})} \sigma_{k,l}^0 \frac{\partial y_j}{\partial (\log c_{0,l})}$$

The last expression is the covariance (or variance, if  $i = j$ ) of the model outputs.
